# Supplementary material
Source: Springer Nature journal article supplement (https://www.springermedizin.de/resource/supplementary/13063_2014_2096_MOESM1_ESM.pdf/9621330)

# LeoPARDS CONSORT Flow Diagram

ICU

Within 24 h of  
meeting  
inclusion criteria

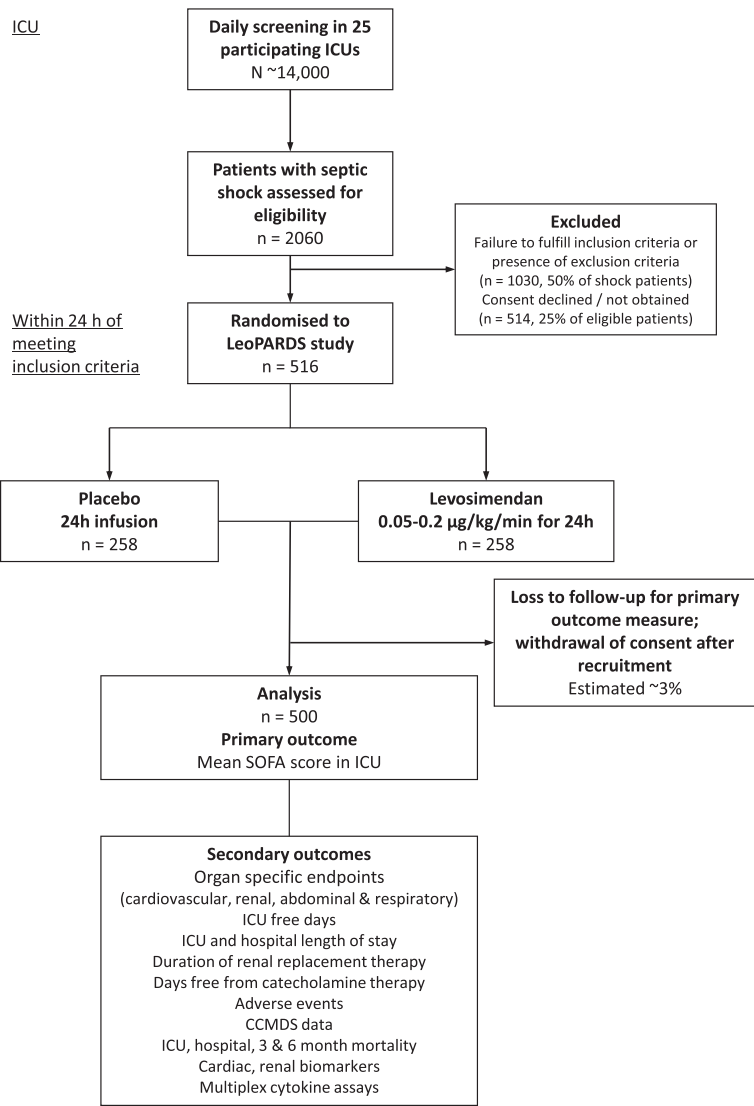

Supplement: MOESM1 [file 9621330]
